# Supplementary material for: Synergistic effect of quinary molten salts and ruthenium catalyst for high-power-density lithium-carbon dioxide cell
Source: PubMed Central journal article supplement (PMC6978343; doi:10.1038/s41467-019-14121-1), 2020-01-23
Supplement: 41467_2019_14121_MOESM1_ESM.pdf [file 41467_2019_14121_MOESM1_ESM.pdf]

**Supplementary Information**

**Synergistic effect of quinary molten salts and Ruthenium catalyst for high-power-density Lithium-carbon dioxide cell**

**Kyungeun Baek *et al.***

## Supplementary Methods

### Calculation details

The decomposition mechanism of  $\text{Li}_2\text{CO}_3$  compound (charge process), and the formation mechanism of  $\text{Li}_2\text{CO}_3$  with and without Ru surface (discharge process) were by density functional theory (DFT) calculation. DFT calculations were performed with the DMol<sup>3</sup> program<sup>1,2</sup>. Generalized gradient approximation (GGA) and PBEsol were used for exchange-correlation functional<sup>3</sup>. The effective core potentials were used for core treatment with the basis set of DNP 4.4 level. The convergence tolerances of energy, force and displacement were set to  $1 \times 10^{-5}$  Ha,  $0.002 \text{ Ha } \text{\AA}^{-1}$ , and  $0.005 \text{ \AA}$ , respectively. To include van der Waals interaction effect, Tkatchenko–Scheffler (TS) scheme was used<sup>4</sup>. The Brillouin-zone was sampled by a Monkhorst–Pack and  $k$ -point meshes for the bulk and slab models were set to  $(2 \times 3 \times 3)$  and  $(2 \times 1 \times 1)$ , respectively. The COSMO solvation model was applied and the dielectric constant of quinary molten salt ( $\epsilon = 5.0$ ) was used<sup>5,6</sup>. Single linear synchronous transit (LST) and quadratic synchronous transit (QST) methodologies were applied to calculate transition states in reaction pathways of  $\text{Li}_2\text{CO}_3$  decomposition, and the convergence criteria value of the root mean square (RMS) force was set to  $0.003 \text{ Ha } \text{\AA}^{-1}$ <sup>7,8</sup>.

### Model systems

The unit cell structure of  $\text{Li}_2\text{CO}_3$ , which was reported from previously experimental XRD study, was optimized by DFT calculations (Supplementary Fig. 11A)<sup>9</sup>. The optimized lattice parameters for the monoclinic  $\text{Li}_2\text{CO}_3$  (i.e.,  $a = 8.25 \text{ \AA}$ ,  $b = 4.90 \text{ \AA}$ , and  $c = 5.89 \text{ \AA}$ ) were well matched with those of experimental crystal. To construct the surface slab models, we considered (001)-oriented three layers of the  $\text{Li}_2\text{CO}_3$  slab model because of the most stable surface energy (Supplementary Fig. 11B)<sup>10,11</sup>. In all calculations for slab model, one layer on

the top was allowed to relax, while two layers at the bottom were fixed to their position to represent the bulk phase during geometry optimization calculation. The vacuum space with a height of at least 12 Å was applied to slab model. To calculate the synergistic effect of quinary molten nitrate salts and Ru nanoparticles in discharge process, we constructed a Ru surface slab model, which consisted of (101) surface observed in the experiment. The slab models for our calculations consisted of 4 atomic layers. Among four layers, two layers on the top were relaxed while two layers on the bottom were fixed to represent the bulk phase. The vacuum space was applied at least 20 Å for all slab models. For the charge balance of system,  $K^+$ , which has the largest molar ratio in molten salt, was added explicitly to vacuum space of each slab model (Supplementary Fig. 21). Note that the vacuum space was treated to be implicitly the molten salt environment by the COSMO method.

### Free energy calculations

The  $Li^+$  extraction free energy, reaction free energy, activation free energy for decomposition reactions were calculated as follows,

$$\Delta G_X = \Delta E_X + \Delta ZPE - T\Delta S \quad (X = TRV, R, a) \quad (1)$$

where  $\Delta E_X$  represents the  $Li^+$  extraction energy ( $\Delta E_{TRV}$ ) in electrochemical reaction, and the heat of reaction ( $\Delta E_R$ ), and activation energy ( $\Delta E_a$ ) for each reaction,  $\Delta ZPE$  is the change of zero-point vibrational enthalpy, and  $-T\Delta S$  is the entropic contribution at 100 °C and 150 °C, where  $T$  is the temperature of system and  $\Delta S$  is the change of entropy. Notably, the electrochemical reaction energy, which is calculated directly from the differences between total energies of before and after the extraction of lithium, is represented as the theoretical

lithiation–delithiation reaction voltage ( $\Delta E_{TRV}$ )<sup>12</sup>. This energy was calculated as follows,

$$\Delta E_{TRV} = E_{Li_xCO_3} + (2-x)E_{Li} - E_{Li_2CO_3} \quad (x = 0, 1, 2) \quad (2)$$

where  $E_{Li_xCO_3}$  and  $E_{Li_2CO_3}$  are the total energies of a formula unit for  $Li_xCO_3$  and  $Li_2CO_3$  structure, respectively, and  $E_{Li}$  is the energy of one atom in the lithium metal.

For the discharge process after charge process in Supplementary Fig. 7, Gibbs free energies were calculated based on equation (1) substituting  $\Delta ZPE$  with the vibrational enthalpy in each temperature.

**Supplementary Table 1.** Summary of electrochemical performance for recently reported Li-CO<sub>2</sub> batteries.

| Cathode materials                                           | Electrolyte                                                                                                           | Current density          | Cycle | Ref |
|-------------------------------------------------------------|-----------------------------------------------------------------------------------------------------------------------|--------------------------|-------|-----|
| CNT                                                         | 1 M LiTFSI in TEGDME                                                                                                  | 50 mA g <sup>-1</sup>    | 29    | 13  |
| CNT                                                         | LiTFSI in TEGDME, PVDF-HFP in NMP, HMPP-TMPET (4:5:3 wt%) (GPE)                                                       | 500 mA g <sup>-1</sup>   | 60    | 14  |
| Ketjen black                                                | 1 M LiTFSI in TEGDME + LiBr                                                                                           | 100 mA g <sup>-1</sup>   | 38    | 15  |
| N-doped graphene (Ni-NG)                                    | 1 M LiTFSI in TEGDME                                                                                                  | 100 mA g <sup>-1</sup>   | 100   | 16  |
| N-doped graphene (Cu-NG)                                    | 1 M LiTFSI in TEGDME                                                                                                  | 200 mA g <sup>-1</sup>   | 50    | 17  |
| B,N-Codoped holey graphene (BN-hG)                          | 1 M LiTFSI in TEGDME                                                                                                  | 100 mA g <sup>-1</sup>   | 200   | 18  |
| MOF + CNT<br>Mn(HCOO) <sub>2</sub>                          | 1 M LiTFSI in TEGDME                                                                                                  | 200 mA g <sup>-1</sup>   | 50    | 19  |
| NiO + CNT                                                   | 1 M LiTFSI in TEGDME                                                                                                  | 50 mA g <sup>-1</sup>    | 42    | 20  |
| RuO <sub>2</sub> + CNT                                      | 0.25 M LiCF <sub>3</sub> SO <sub>3</sub> in TEGDME                                                                    | 50 mA g <sup>-1</sup>    | 30    | 21  |
| Fiber-shaped N-CNTs @ Ti                                    | 1 M LiTFSI in TEGDME                                                                                                  | 250 mA g <sup>-1</sup>   | 45    | 22  |
| Ru + Super P                                                | LiCF <sub>3</sub> SO <sub>3</sub> in TEGDME                                                                           | 100 mA g <sup>-1</sup>   | 80    | 23  |
| RuO <sub>2</sub> /LDO + Super P                             | 1 M LiTFSI in TEGDME                                                                                                  | 200 mA g <sup>-1</sup>   | 60    | 24  |
| Ir + CNFs                                                   | 1 M LiTFSI in TEGDME                                                                                                  | 50 mA g <sup>-1</sup>    | 45    | 25  |
| IrO <sub>2</sub> /d-MnO <sub>2</sub> -carbon cloth          | 1 M LiClO <sub>4</sub> in TEGDME                                                                                      | 400 mA g <sup>-1</sup>   | 378   | 26  |
| Graphene                                                    | 1 M LiTFSI in TEGDME                                                                                                  | 50 mA g <sup>-1</sup>    | 20    | 27  |
| CNT                                                         | Poly(methacrylate)/poly(ethylene glycol)-LiClO <sub>4</sub> -3wt%SiO <sub>2</sub> composite polymer electrolyte (CPE) | 100 mA g <sup>-1</sup>   | 100   | 28  |
| CoPPc                                                       | 1 M LiTFSI in TEGDME                                                                                                  | 0.05 mA cm <sup>-2</sup> | 50    | 29  |
| Ru-Cu-graphene                                              | 1 M LiTFSI in TEGDME                                                                                                  | 400 mA g <sup>-1</sup>   | 100   | 30  |
| Mo <sub>2</sub> C + CNT                                     | 1 M LiCF <sub>3</sub> SO <sub>3</sub> in TEGDME                                                                       | 0.02 mA                  | 40    | 31  |
| Ru + CNT                                                    | 1 M LiTFSI in TEGDME                                                                                                  | 200 mA g <sup>-1</sup>   | 200   | 32  |
| P-Mn <sub>2</sub> O <sub>3</sub> + Ketjen black             | 0.5 M LiClO <sub>4</sub> in DMSO                                                                                      | 50 mA g <sup>-1</sup>    | 45    | 33  |
| N-doped carbon nanofibers (IrNSs-CNFs)                      | 1 M LiTFSI in TEGDME                                                                                                  | 500 mA g <sup>-1</sup>   | 400   | 34  |
| Anatase TiO <sub>2</sub> nanoparticle/<br>CNT-CNF composite | 1 M LiTFSI in DMSO                                                                                                    | 0.05 mA cm <sup>-2</sup> | 25    | 35  |
| RuP <sub>2</sub> -NPCFs                                     | 1 M LiTFSI in TEGDME                                                                                                  | 200 mA g <sup>-1</sup>   | 200   | 36  |
| NiFe @ NC/PPC                                               | 1 M LiCF <sub>3</sub> SO <sub>3</sub> in TEGDME                                                                       | 0.05 mA cm <sup>-2</sup> | 109   | 37  |
| Ru @ CNFs                                                   | 1 M LiTFSI in TEGDME                                                                                                  | 100 mA g <sup>-1</sup>   | 50    | 38  |

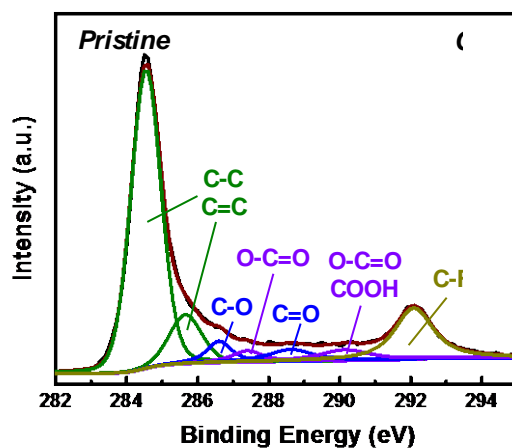

**Supplementary Figure 1** | Characterization of pristine Ketjen black cathode. High-resolution XPS C1s spectra of pristine Ketjen black carbon cathode.

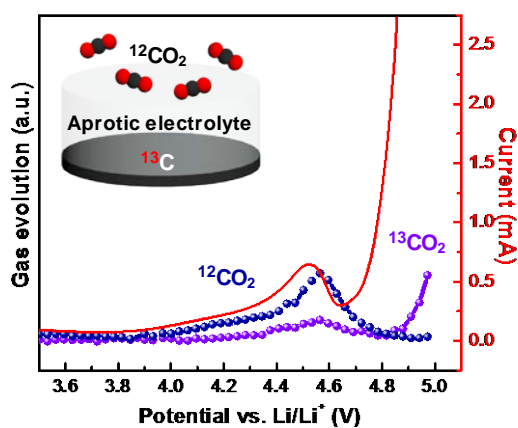

**Supplementary Figure 2** | Linear-sweep voltammetry profile (at a scan rate of 0.1 mV s<sup>-1</sup>) and complementary gas analysis of 1 M LiTFSI in TEGDME containing a cell with a <sup>13</sup>C cathode for a 1 mAh cell discharged in a CO<sub>2</sub> environment.

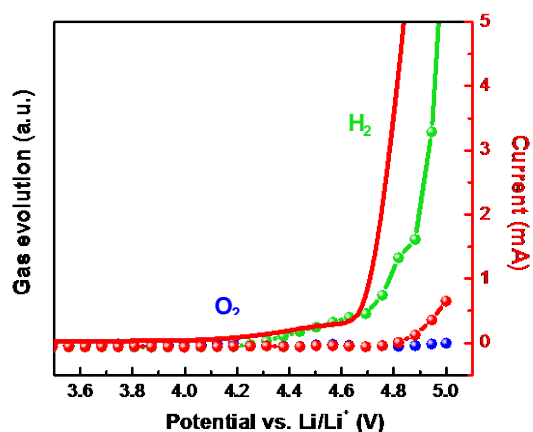

**Supplementary Figure 3** | Aprotic solvent decomposition potential analysis using linear sweep voltammetry with *in situ* DEMS. Linear sweep voltammetry with *in situ* DEMS results of a fresh cell containing 1 M LiTFSI in TEGDME with scan rate of  $0.1 \text{ mV s}^{-1}$ .

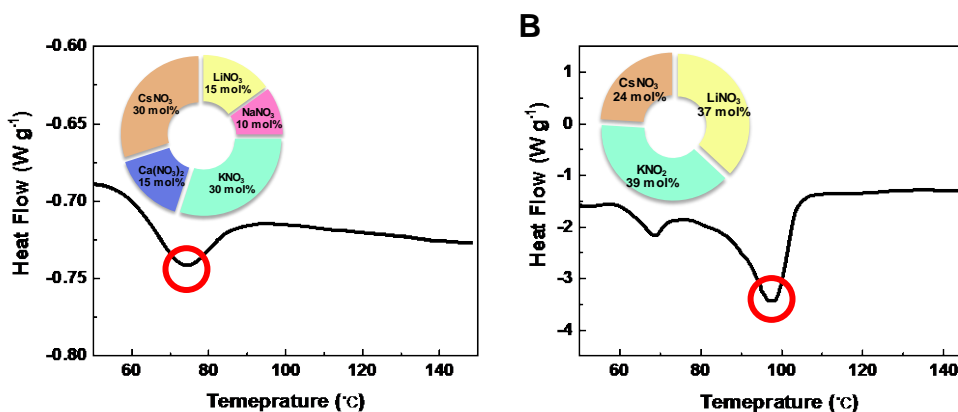

**Supplementary Figure 4** | Quinary and ternary molten salt electrolyte. **A-B** Differential scanning calorimeter (DSC) profile of the quinary eutectic molten salt (**A**) and ternary eutectic molten salt (**B**) obtained at a scanning rate of  $5.0 \text{ }^\circ\text{C min}^{-1}$  with schematic illustration of eutectic molten salt electrolyte containing salt portions (inset images).

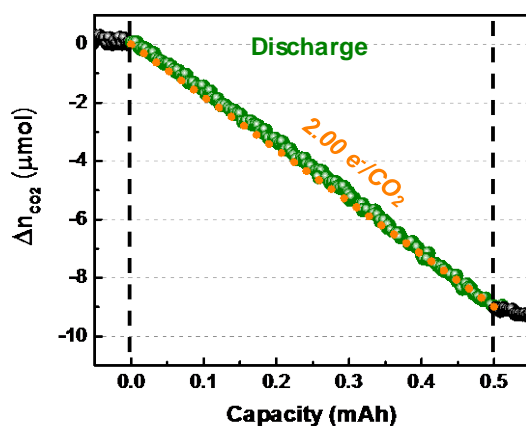

**Supplementary Figure 5** |  $\text{CO}_2$  gas consumption measurement in the nitrate-based electrolyte. *In situ* DEMS result of  $\text{CO}_2$  gas consumption during discharge using quinary molten salt electrolyte with Super P carbon cathode at  $100\text{ }^\circ\text{C}$  ( $200\text{ }\mu\text{A}$  for 2 h 30 min). The orange dots indicate the ideal electrons-to- $\text{CO}_2$  ratio of 2.0.

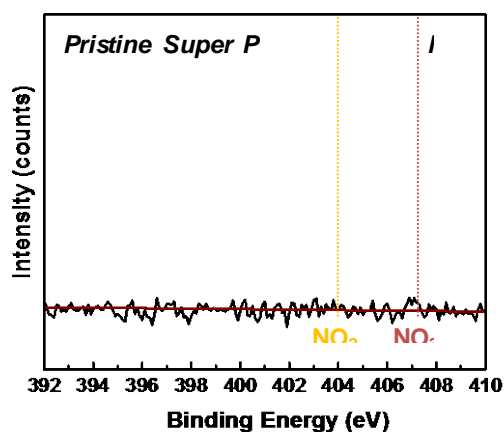

**Supplementary Figure 6** | High-resolution XPS N1s spectra of the Super P carbon cathode before discharging.



**Supplementary Table 2.** Thermodynamic energy terms in the Gibbs free energy of the reaction.

| Electrochemical reaction                                                                                      | Temp. (°C) | $\Delta H$ (eV) | $-T\Delta S$ (eV) | $\Delta G$ (eV) | Discharge potential versus Li/Li <sup>+</sup> (V) |
|---------------------------------------------------------------------------------------------------------------|------------|-----------------|-------------------|-----------------|---------------------------------------------------|
| $2\text{Li}^+ + \text{CO}_2 + 2\text{e}^- + \text{NO}_3^- \rightarrow \text{Li}_2\text{CO}_3 + \text{NO}_2^-$ | 100        | -5.23           | 0.40              | -4.83           | 2.42                                              |
|                                                                                                               | 150        | -5.21           | 0.43              | -4.78           | 2.39                                              |

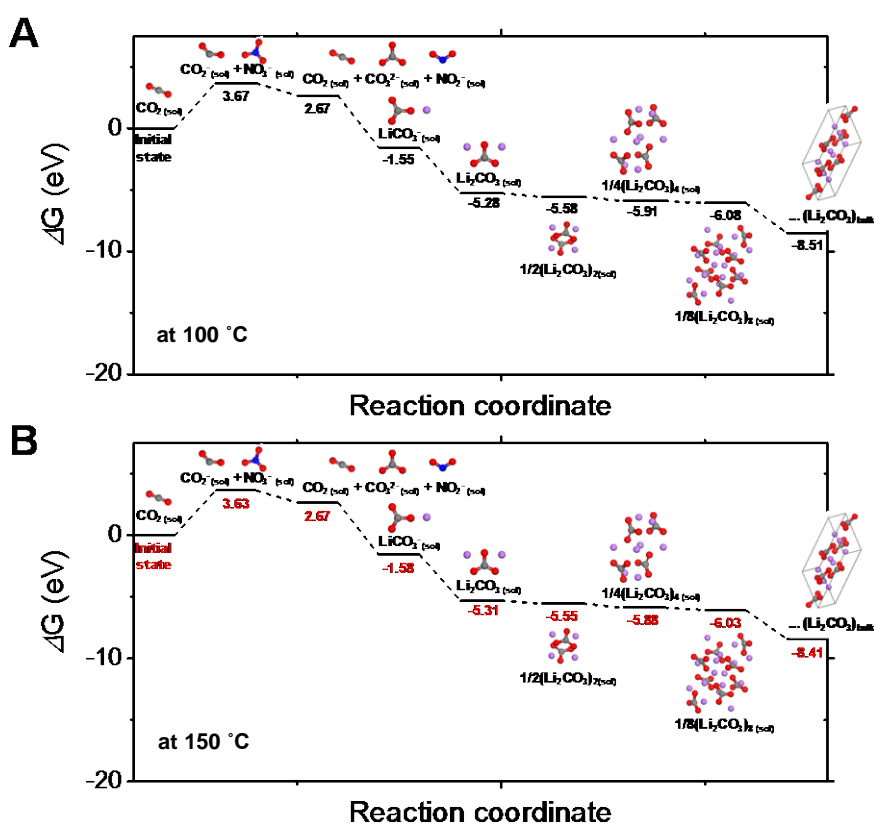

**Supplementary Figure 7** | Free energy diagrams of the discharge process at 100 and 150 °C.

**A–B** The electrochemical reaction starts from CO<sub>2</sub>. The black numbers in **A** and the red numbers in **B** below each energy state represent the relative free energies compared to each initial state at 100 and 150 °C. Oxygen, carbon, nitrogen, and lithium atoms are colored in red, gray, blue, and purple, respectively.

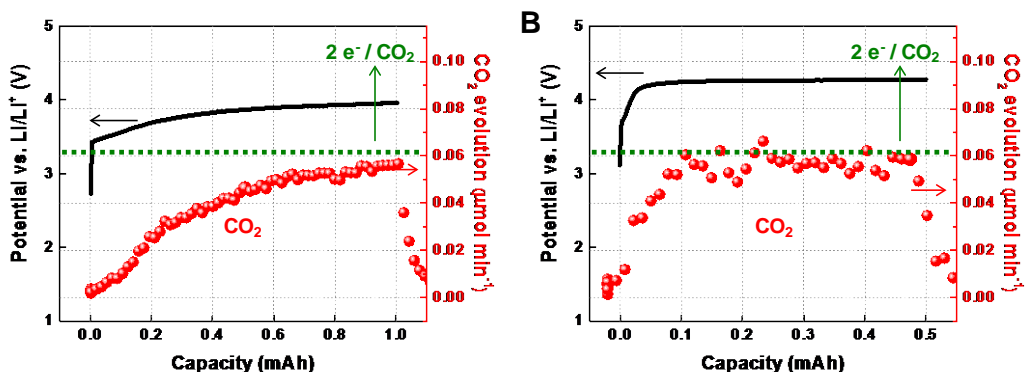

**Supplementary Figure 8** | **A** Galvanostatic charge plot and the corresponding DEMS results of the deep discharged Li-CO<sub>2</sub> cell with quinary molten salt electrolyte at 100 °C. **B** Galvanostatic and corresponding DEMS measurements after reaching a CO<sub>2</sub> evolution rate of 0.06 μmol min<sup>-1</sup> in **A** and intentionally stopping and restarting the Li-CO<sub>2</sub> cell (applied current: 0.2 mA).

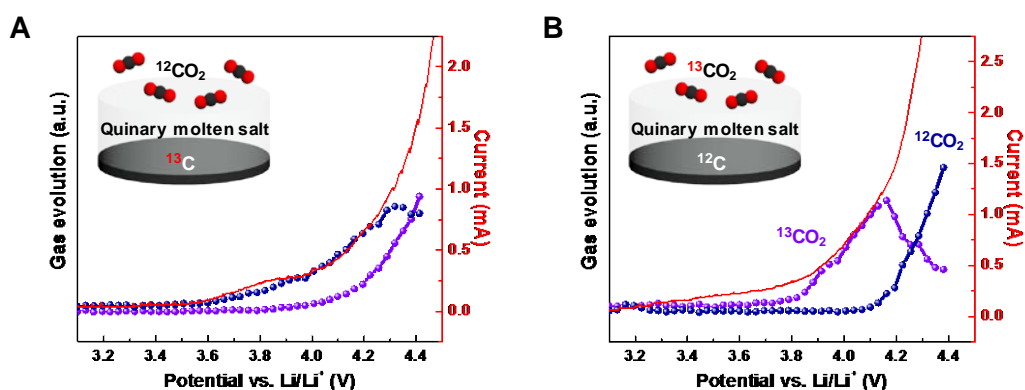

**Supplementary Figure 9** | **A–B** Linear-sweep voltammetry profiles (at a scan rate of 0.1 mV s<sup>-1</sup>) and complementary gas analysis of a quinary molten salt electrolyte containing a cell with <sup>12</sup>CO<sub>2</sub>-<sup>13</sup>C (**A**) and <sup>13</sup>CO<sub>2</sub>-<sup>12</sup>C (**B**) cathodes for a cell discharged in a CO<sub>2</sub> environment at 100 °C.

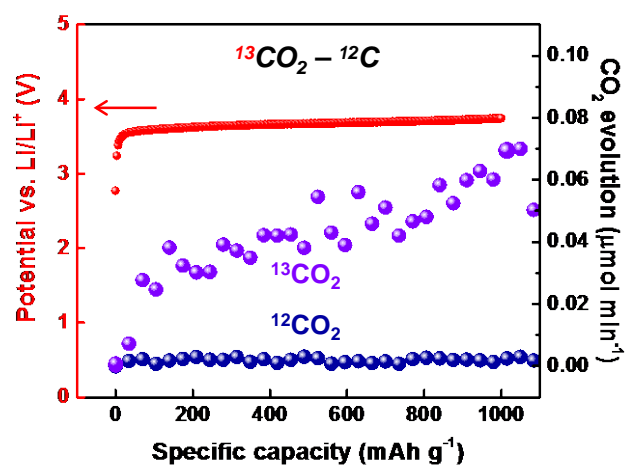

**Supplementary Figure 10** | Galvanostatic charge plot (applied current density: 0.4 A g<sup>-1</sup>) and corresponding DEMS results of a Li-CO<sub>2</sub> cell containing a quinary molten salt electrolyte with a <sup>13</sup>CO<sub>2</sub>-<sup>12</sup>C cathode discharged in a CO<sub>2</sub> environment at 100 °C.

**A**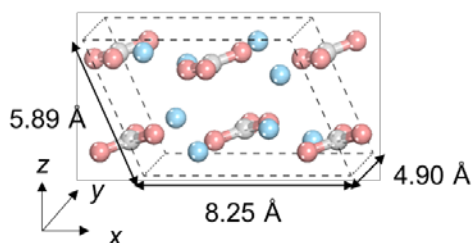**B**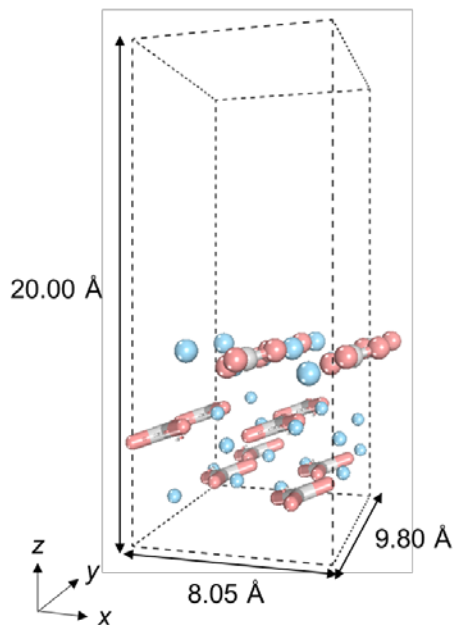

**Supplementary Figure 11** |  $\text{Li}_2\text{CO}_3$  model systems employed for reaction step calculation.

**A-B** Unit cell structure (**A**) for monoclinic  $\text{Li}_2\text{CO}_3$  (space group -  $C2/c$ ), and slab model (**B**) of three layered  $\text{Li}_2\text{CO}_3$  on (001) direction. Carbon, oxygen, and lithium atoms are colored in light gray, pink, and sky blue, respectively. For clear view in **B**, top layer is presented by ball-and-stick style, and bottom two layers, which are fixed in position, are displayed in stick style.

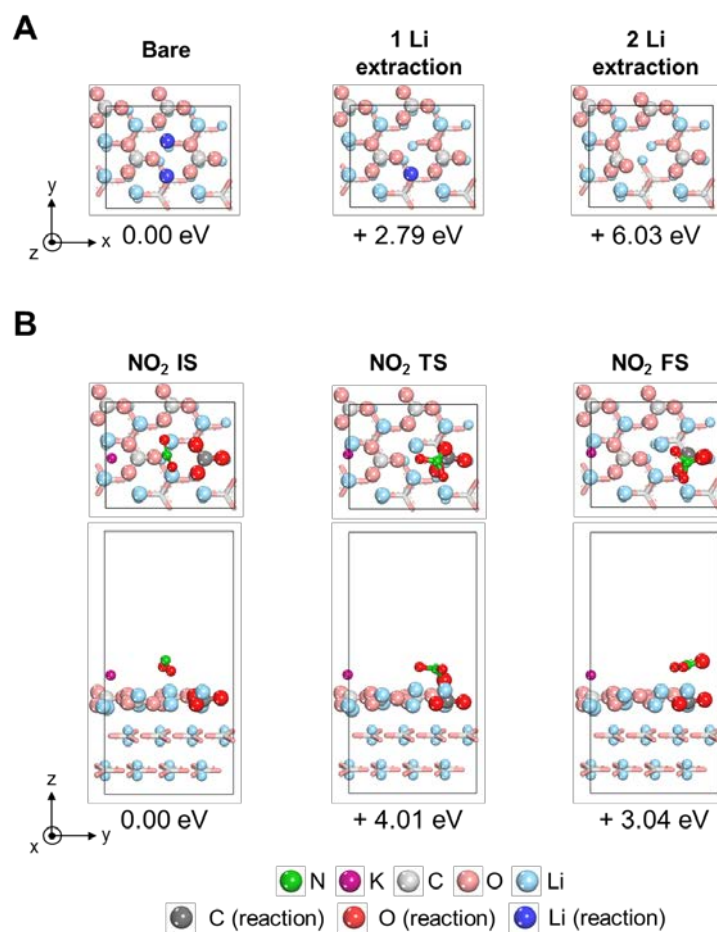

**Supplementary Figure 12** | Comparison of the electrochemical reaction step and reaction step of  $\text{Li}_2\text{CO}_3$  decomposition on the surface at 100 °C. **A** Optimized configurations of the extraction of Li reactions. **B** Optimized configurations of the reaction mechanism between  $\text{CO}_3^{2-}$  and  $\text{NO}_2^-$  to produce  $\text{CO}_2$  and  $\text{NO}_3^-$ . The states and relative energies are written in the top and bottom of each figure.  $\text{NO}_2$  IS,  $\text{NO}_2$  TS, and  $\text{NO}_2$  FS represent initial state, transition state, and final state, respectively. Nitrogen, potassium, carbon, oxygen, and lithium atoms are colored in green, purple, light gray, pink, and sky blue. And, for the clear view, the carbon, oxygen, and lithium atoms which participate in the reaction are colored in dark gray, red, and blue.

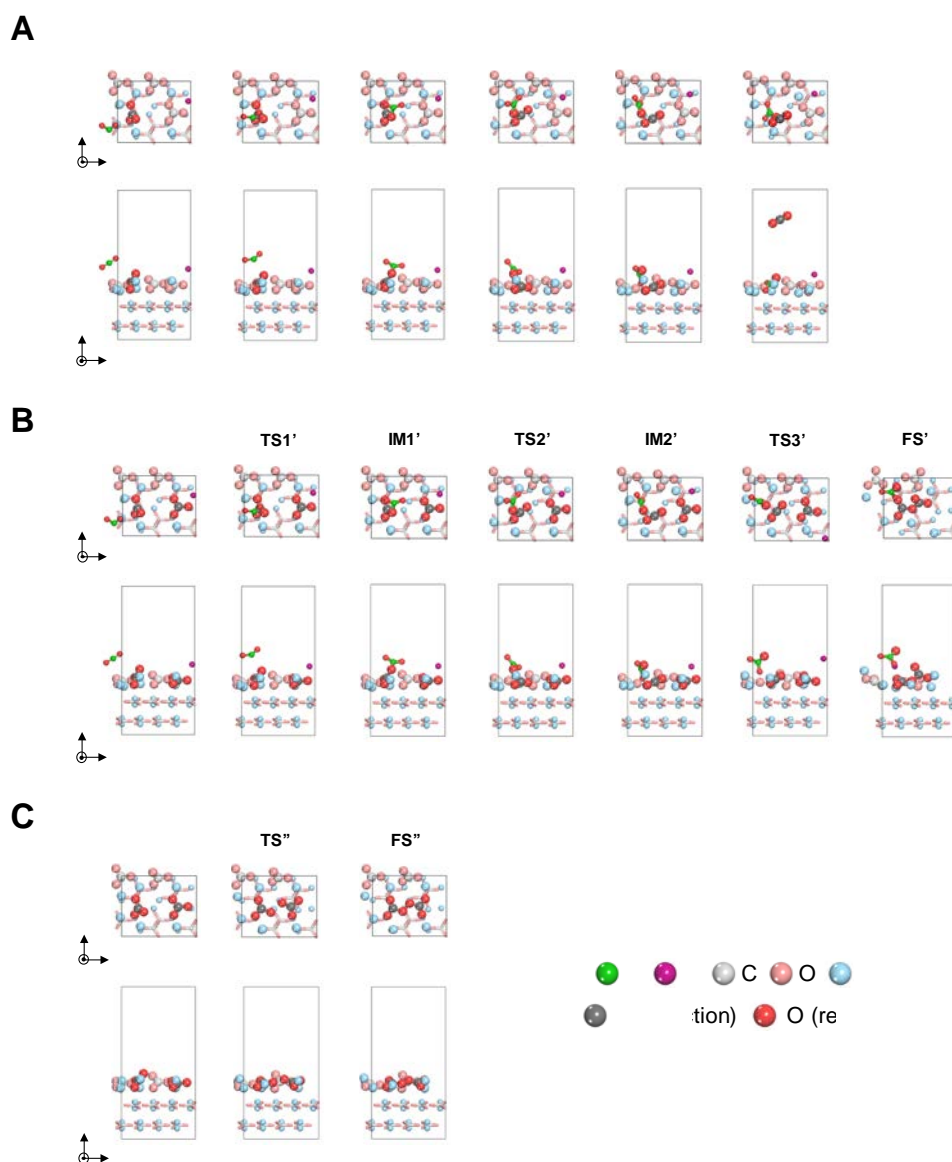

**Supplementary Figure 13** | Optimized configurations of three plausible pathways for reaction step of  $\text{Li}_2\text{CO}_3$  decomposition. **A-C** Reaction path a (**A**), reaction path b (**B**), and reaction path c (**C**) which produce  $\text{NO}_3^-$  and  $\text{CO}_2$ ,  $\text{NO}_3^-$  and  $\text{C}_2\text{O}_5^{2-}$ , and  $\text{C}_2\text{O}_6^{2-}$ , respectively. The names of states are written on the top of each figure. IS, IM, TS, and FS in each reaction mechanism represent the initial state, intermediate state, transition state, and final state, respectively. Color scheme is same with Supplementary Fig. 12.

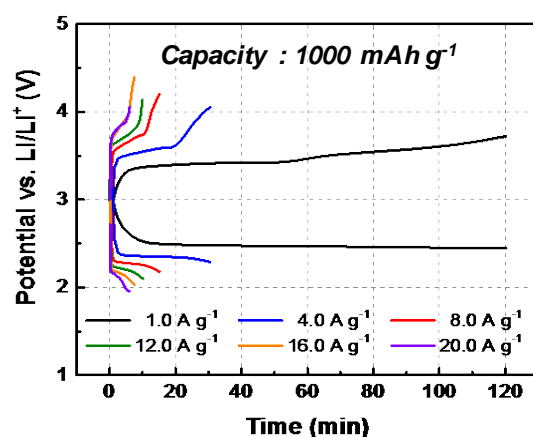

**Supplementary Figure 14** | Plot of the potential versus time of a Li–CO<sub>2</sub> cell with a quinary molten salt electrolyte at current densities ranging from 1.0 to 20.0 A g<sup>-1</sup> at 150 °C.

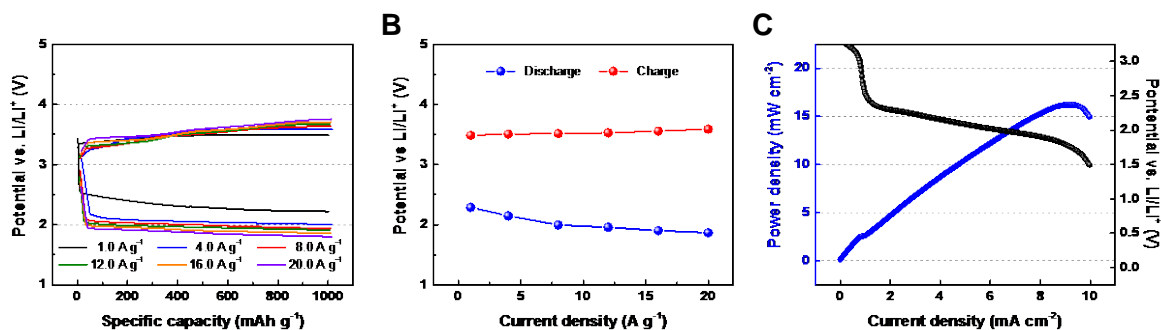

**Supplementary Figure 15** | Electrochemical characterization of a Li–CO<sub>2</sub> cell with a ternary molten salt electrolyte. **A–B** Galvanostatic discharge–charge profile (**A**) and plot of the discharge–charge overpotential (**B**) measured at 500 mAh g<sup>-1</sup> for a Li–CO<sub>2</sub> cell with a ternary molten salt electrolyte at current densities ranging from 1.0 to 20.0 A g<sup>-1</sup> at 150 °C. **C** Polarization and power density curves of a Li–CO<sub>2</sub> cell using a ternary molten salt electrolyte at a scan rate of 0.01 mA s<sup>-1</sup> and 150 °C.

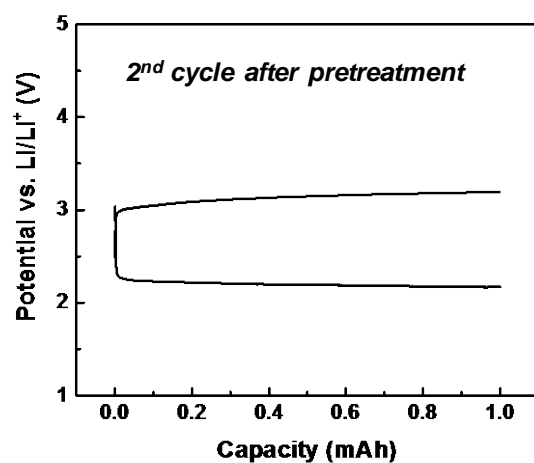

**Supplementary Figure 16** | Galvanostatic discharge-charge plot of a Li-CO<sub>2</sub> cell using a quinary molten salt electrolyte for the 2<sup>nd</sup> cycle after a pretreatment at 150 °C (applied current: 0.2 mA).



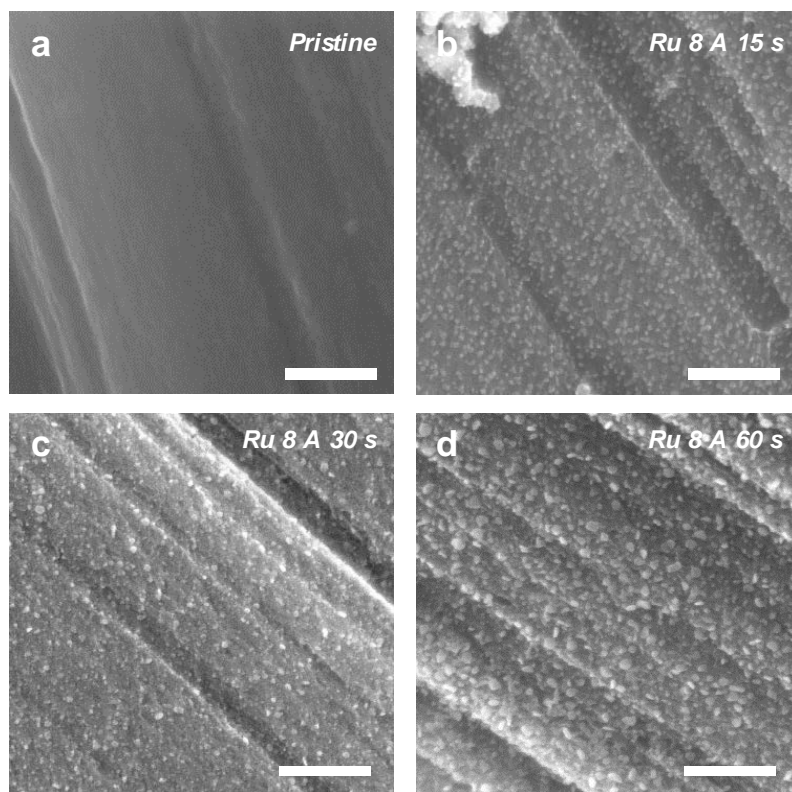

**Supplementary Figure 17** | SEM images of Ru nanoparticles on carbon cathodes. **A-D** SEM images for pristine carbon cathode (**A**) and Ru doped carbon cathode using joule heating method applied current at 8 A for 15 s (**B**), 30 s (**C**), and 60 s (**D**).

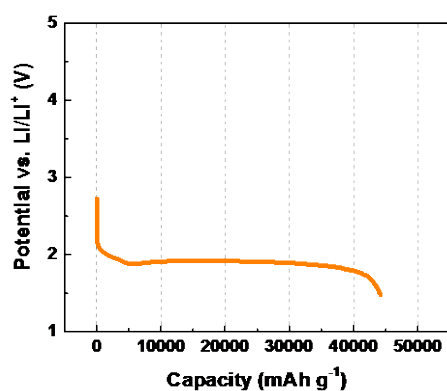

**Supplementary Figure 18** | The discharge profile of Li-CO<sub>2</sub> cell with quinary molten salt electrolyte and Ru/C cathode. Galvanostatic profile of the Li-CO<sub>2</sub> battery with quinary molten salt electrolyte and Ru/C cathode at 10.0 A g<sup>-1</sup> within a voltage cut-off 1.5 V.

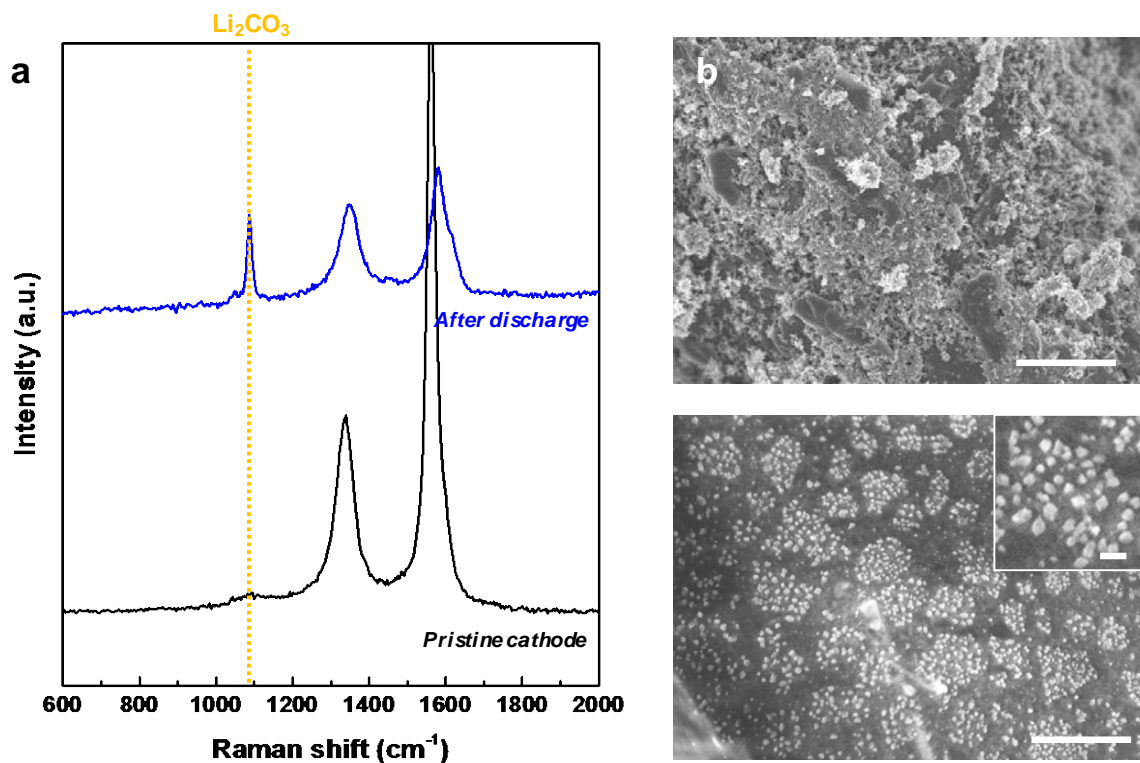

**Supplementary Figure 19** | Discharge product for a Li-CO<sub>2</sub> cell with an Ru/C cathode and quinary molten salt electrolyte at 150 °C. **A** Raman spectra of the Ru/C cathode before (black line) and after (blue line) discharging a 1 mAh cell in a CO<sub>2</sub> environment. **B-C** Top-view SEM images of the Ru/C cathode before (**B**) and after (**C**) discharging a 1 mAh cell in a CO<sub>2</sub> environment. The cathode was rinsed with an *N*-methylacetamide solvent in an Ar-filled glove box.

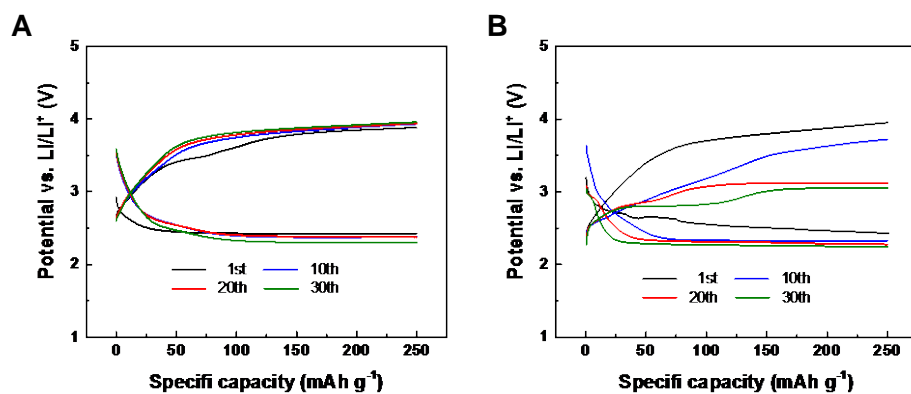

**Supplementary Figure 20** | Cycling performance for a Li-CO<sub>2</sub> cell with an aprotic electrolyte. **A–B** Galvanostatic discharge–charge profiles of a Li-CO<sub>2</sub> battery containing a 1 M LiTFSI/TEGDME electrolyte with pristine carbon (**A**) and Ru on carbon (**B**) cathodes at a current density of 50.0 mA g<sup>-1</sup>.

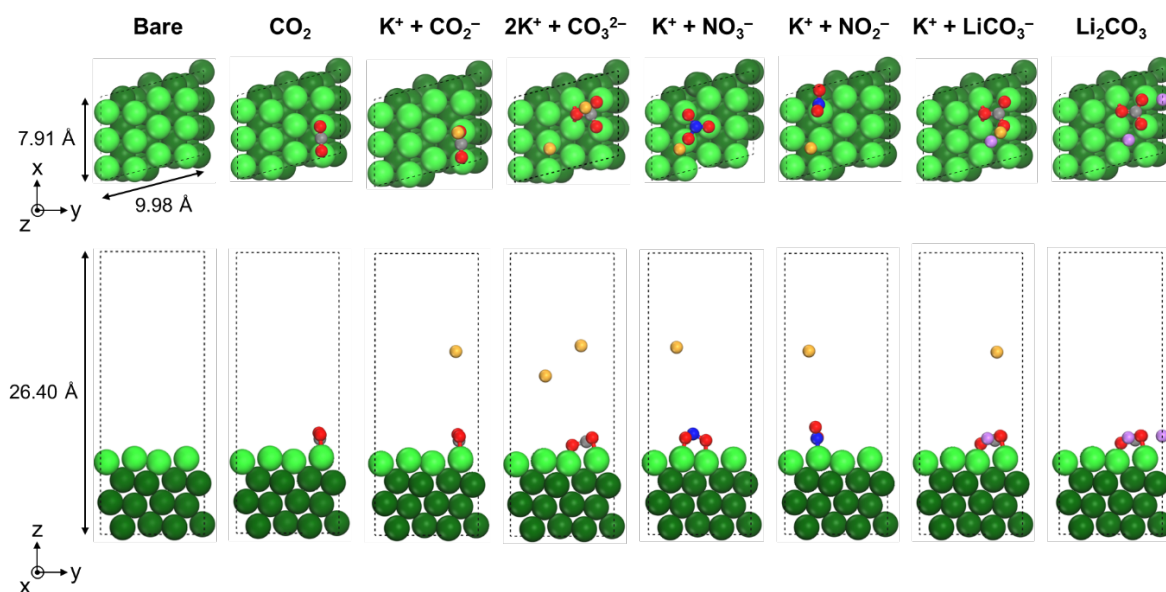

**Supplementary Figure 21** | Optimized configurations of each molecule adsorbed on Ru (101) surface for discharge process. The empty region was treated by the COSMO method to impose the explicit molten salt phase. To balance an atomic charge,  $K^+$  ion was added in explicit solvent phase of each model wherever necessary. Nitrogen, carbon, oxygen, ruthenium, lithium, and potassium atoms are colored in blue, light gray, red, dark cyan, purple, and yellow, respectively. For the clear view, Ru atoms in the top layer were colored in mint green.

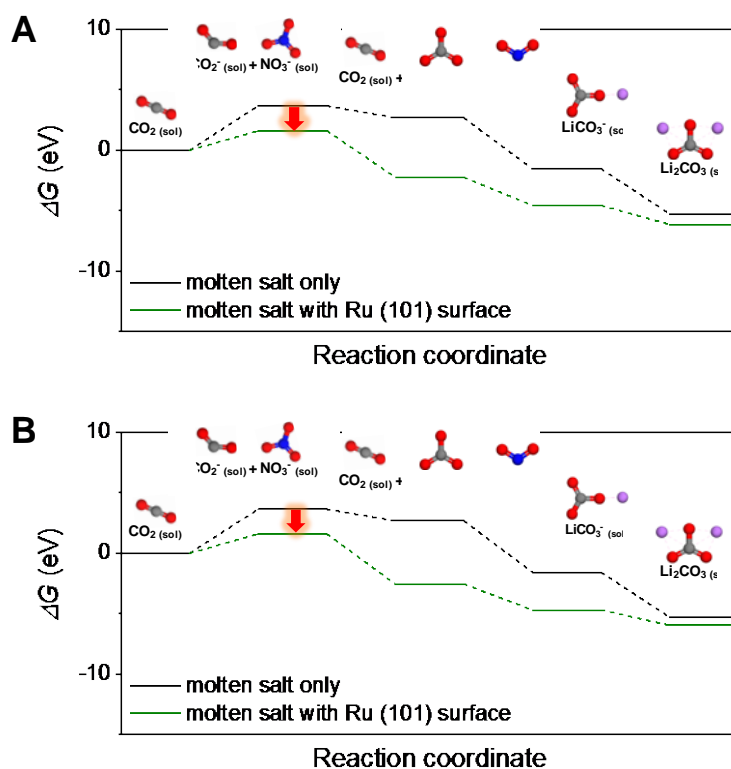

**Supplementary Figure 22** | Free energy diagrams of discharge process from CO<sub>2</sub> reduction to one Li<sub>2</sub>CO<sub>3</sub> formation at 100 °C and 150 °C. Electrochemical reaction starts from CO<sub>2</sub> at 100 °C (**A**) and 150 °C (**B**), respectively. The black and green numbers in each **A** and **B** represent the relative free energies compared to each initial state of molten salt only and Ru (101) surface. Oxygen, carbon, nitrogen, lithium atoms are colored in red, gray, blue, and purple, respectively. Red arrow and number represent the change of  $\Delta G$  in potential determining step.

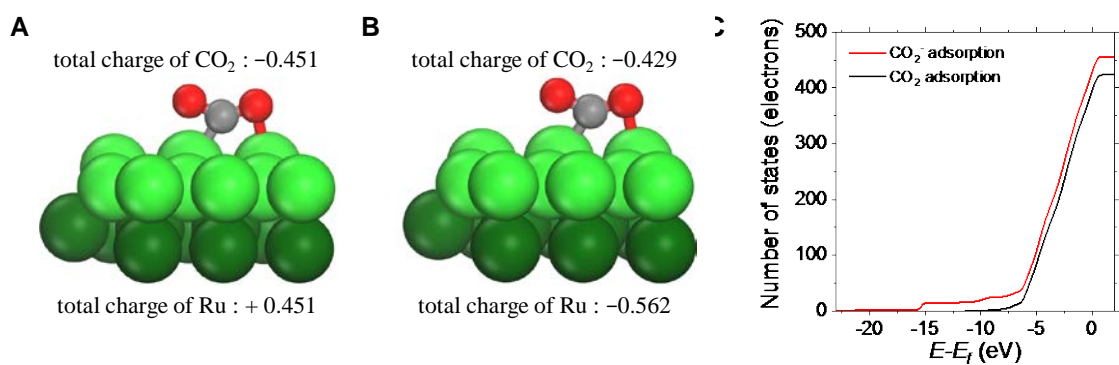

**Supplementary Figure 23** | Atomic charges and configurations of CO<sub>2</sub>-Ru surface (A) and CO<sub>2</sub><sup>-</sup>-Ru surface (B). Integrated DOS of all Ru atoms in CO<sub>2</sub>-Ru surface and CO<sub>2</sub><sup>-</sup>-Ru surface (C).

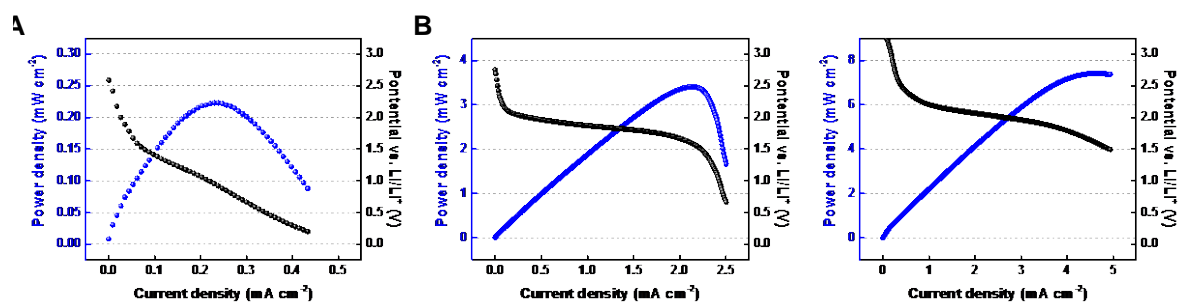

**Supplementary Figure 24** | Power density profiles of Li-CO<sub>2</sub> cell with quinary molten salt. A-C Polarization and power density curves of quinary molten salt at 100 °C (A), 110 °C (B), and 130 °C (C) with a carbon cathode at a scan rate of 0.01 mA s<sup>-1</sup>.

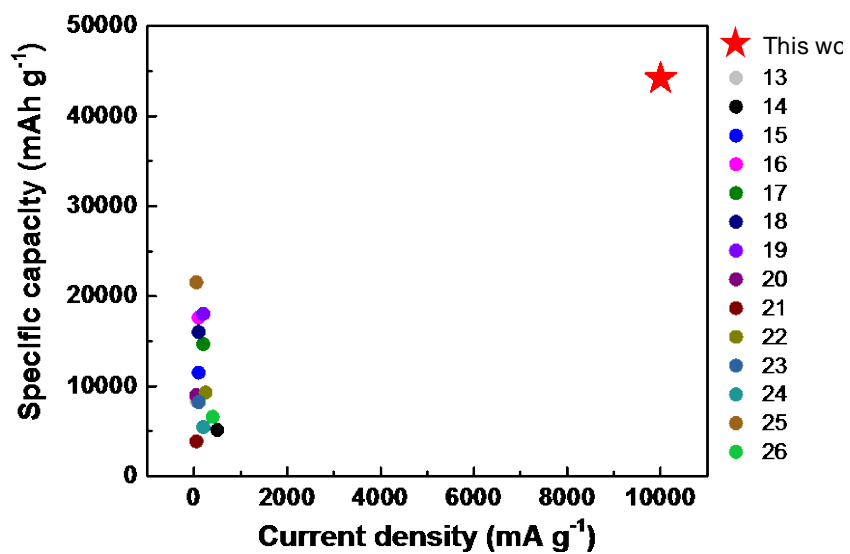

**Supplementary Figure 25** | Summary of the current density and specific capacity for recent progress Li-CO<sub>2</sub> batteries.



## Supplementary References

1. Delley, B. An all-electron numerical method for polyatomic molecules. *J. Chem. Phys.* **92**, 508–517 (1990).
2. Delley, B. From molecules to solids with the Dmol<sup>3</sup> approach. *J. Chem. Phys.* **113**, 7756–7764 (2000).
3. Perdew, J. P., Ruzsinszky, A., Csonka, G. I., Vydrov, O. A., Scuseria, G. E., Constantin, L. A., Zhou, X. & Burke, K. Restoring the density-gradient expansion for exchange in solids and surfaces. *Phys. Rev. Lett.* **100**, 136406 (2008).
4. Tkatchenko, A. & Scheffler, M. Accurate molecular van der Waals interactions from ground-state electron density and free-atom reference data. *Phys. Rev. Lett.* **102**, 073005 (2009).
5. Klamt, A. & Schüürmann, G. COSMO: a new approach to dielectric screening in solvents with explicit expressions for the screening energy and its gradient. *J. Chem. Soc. Perkin Trans. 2* **5**, 799–805 (1993).
6. Looyenga, H. Dielectric constants of homogeneous mixture. *Mol. Phys.* **9**, 501–511 (1965).
7. Bell, S. & Crighton, J. S. Locating transition states. *J. Chem. Phys.* **80**, 2464–2475 (1984).
8. Halgren, T. A. & Lipscomb, W. N. The synchronous-transit method for determining reaction pathways and locating molecular transition states. *Chem. Phys. Lett.* **49**, 225–232 (1977).
9. Dffenberger, H. & Zemann, J. Kristallographie. Z. Kristallogr., *Cryst. Mater.* **150**, 133–138 (1979).
10. Liu, Z., Qi, Y., Lin, Y. X., Chen, L., Lu, P. & Chen, L. Q. Interfacial study on solid electrolyte interphase at Li metal anode: implication for Li dendrite growth. *J. Electrochem. Soc.* **163**, A592–A598 (2016).
11. Ling, C., Zhang, R., Takechi, K. & Mizuno, F. Intrinsic Barrier to Electrochemically Decompose Li<sub>2</sub>CO<sub>3</sub> and LiOH. *J. Phys. Chem. C* **118**, 26591–26598 (2014).
12. Kalantarian, M. M., Asgari, S. & Mustarelli, P. Theoretical investigation of Li<sub>2</sub>MnSiO<sub>4</sub> as a cathode material for Li-ion batteries: a DFT study. *J. Mater. Chem. A* **1**, 2847–2855 (2013).
13. Zhang, X., Zhang, Q., Zhang, Z., Chen, Y., Xie, Z., Wei, J. & Zhou, Z. Rechargeable Li–CO<sub>2</sub> batteries with carbon nanotubes as air cathode. *Chem. Commun.* **51**, 14636–14639 (2015).
14. Li, C., Guo, Z., Yang, B., Liu, Y., Wang, Y. & Xia, Y. A rechargeable Li–CO<sub>2</sub> battery with a gel polymer electrolyte. *Angew. Chem. Int. Ed.* **56**, 9126–9130 (2017).
15. Wang, X. G., Wang, C., Xie, Z., Zhang, X., Chen, Y., Wu, D. & Zhou, Z. Improving electrochemical performances of rechargeable Li–CO<sub>2</sub> batteries with an electrolyte redox mediator. *Chem. Electrochem.* **4**, 2145–2149 (2017).
16. Zhang, Z., Wang, X. G., Zhang, X., Xie, Z., Chen, Y. N., Ma, L., Peng, Z. & Zhou, Z. Verifying the rechargeability of Li–CO<sub>2</sub> batteries on working cathodes of Ni nanoparticles highly dispersed on N-doped graphene. *Adv. Sci.* **5**, 1700567 (2018).
17. Zhang, Z., Zhang, Z., Liu, P., Xie, Y., Cao, K. & Zhou, Z. Identification of cathode stability in Li–CO<sub>2</sub> batteries with Cu nanoparticles highly dispersed on N-doped graphene. *J. Mater. Chem. A* **6**, 3218–3223 (2018).

18. Qie, L., Lin, Y., Connell, J. W., Xu, J. & Dai, L. Highly rechargeable lithium  $\text{CO}_2$  batteries with a boron nitrogen doped holey graphene cathode. *Angew. Chem. Int. Ed.* **56**, 6970–6974 (2017).
19. Li, S., Dong, Y., Zhou, J., Liu, Y., Wang, J., Gao, X., Han, Y., Qi, P. & Wang, B. Carbon dioxide in the cage: manganese metal–organic frameworks for high performance  $\text{CO}_2$  electrodes in Li– $\text{CO}_2$  batteries. *Energy Environ. Sci.* **11**, 1318–1325 (2018).
20. Zhang, X., Wang, C., Li, H., Wang, X.-G., Chen, Y.-N., Xie, Z. & Zhou, Z. High performance Li– $\text{CO}_2$  batteries with NiO–CNT cathodes. *J. Mater. Chem. A* **6**, 2792–2796 (2018).
21. Bie, S., Du, M., He, W., Zhang, H., Yu, Z., Liu, J., Liu M., Yan. W., Zhou, L. & Zou, Z. Carbon Nanotube@ $\text{RuO}_2$  as a High Performance Catalyst for Li– $\text{CO}_2$  Batteries. *ACS Appl. Mater. Interfaces* **11**, 5146–5151 (2019).
22. Li, Y., Zhou, J., Zhang, T., Wang, T., Li, X., Jia, Y., Cheng, J., Guan, Q., Liu, E. & Peng, H. Highly surface wrinkled and N doped CNTs anchored on metal wire: a novel fiber shaped cathode toward high performance flexible Li– $\text{CO}_2$  batteries. *Adv. Funct. Mater.* **29**, 1808117 (2019).
23. Yang, S., Qiao, Y., He, P., Liu, Y., Cheng, Z., Zhu, J.-j. & Zhou, H. A reversible lithium– $\text{CO}_2$  battery with Ru nanoparticles as a cathode catalyst. *Energy Environ. Sci.* **10**, 972–978 (2017).
24. Xu, S.-M., Ren, Z.-C., Liu, X., Liang, X., Wang, K.-X. & Chen, J.-S. Carbonate decomposition: low-overpotential Li- $\text{CO}_2$  battery based on interlayer-confined monodisperse catalyst. *Energy Stor. Mater.* **15**, 291–298 (2018).
25. Wang, C., Zhang, Q., Zhang, X., Wang, X. G., Xie, Z. & Zhou, Z. Fabricating Ir/C nanofiber networks as free standing air cathodes for rechargeable Li  $\text{CO}_2$  batteries. *Small* **14**, 1800641 (2018).
26. Mao, Y., Tang, C., Tang, Z., Xie, J., Chen, Z., Tu, J., Cao, G. & Zhao, X. Long-life Li– $\text{CO}_2$  cells with ultrafine  $\text{IrO}_2$ -decorated few-layered  $\delta\text{-MnO}_2$  enabling amorphous  $\text{Li}_2\text{CO}_3$  growth. *Energy Stor. Mater.* **18**, 405–413 (2018).
27. Zhang, Z., Zhang, Q., Chen, Y., Bao, J., Zhou, X., Xie, Z., Wei, J. & Zhou, Z. The First Introduction of Graphene to Rechargeable Li– $\text{CO}_2$  Batteries. *Angew. Chem. Int. Ed.* **54**, 6550–6553 (2015).
28. Hu, X., Li, Z. & Chen, J. Flexible Li  $\text{CO}_2$  Batteries with liquid free electrolyte. *Angew. Chem. Int. Ed.* **129**, 5879–5883 (2017).
29. Chen, J., Zou, K., Ding, P., Deng, J., Zha, C., Hu, Y., Zhao, X., Wu, J., Fan, J. & Li, Y. Conjugated cobalt polyphthalocyanine as the elastic and reprocessible catalyst for flexible Li– $\text{CO}_2$  batteries. *Adv. Mater.* **31**, 1805484 (2018).
30. Zhang, Z., Yang, C., Wu, S., Wnag, A., Zhao, L., Zhai, D., Ren, B., Cao, K. & Zhou, Z. Exploiting Synergistic Effect by Integrating Ruthenium–Copper Nanoparticles Highly Co  $\text{CO}_2$  Batteries. Graphene as E *Adv. Energy Mater.* **9**, 1802805 (2019).
31. Hou, Y., Wang, J., Liu, L., Liu, Y., Chou, S., Shi, D., Liu, H., Wu, Y., Zhang, W. & Chen, J.  $\text{Mo}_2\text{C}/\text{CNT}$ : An Efficient Catalyst for Rechargeable Li– $\text{CO}_2$  Batteries. *Adv. Funct. Mater.* **27**, 1700564 (2017).
32. Xu, S., Chen, C., Kuang, Y., Song, J., Gan, W., Liu, B., Hitz, E. M., Connell, J. W., Lin, Y. & Hu, L. Flexible lithium– $\text{CO}_2$  battery with ultrahigh capacity and stable cycling. *Energy Environ. Sci.* **11**, 3231–3237 (2018).

33. Ma, W., Lu, S., Lei, X., Liu, X. & Ding, Y. Porous Mn<sub>2</sub>O<sub>3</sub> cathode for highly durable Li–CO<sub>2</sub> batteries. *J. Mater. Chem. A* **6**, 20829–20835 (2018).
34. Xing, Y., Yang, Y., Li, D., Luo, M., Chen, N., Ye, Y., Quan, J., Li, L., Yang, D. & Wu, F. Crumpled Ir nanosheets fully covered on porous carbon nanofibers for long life rechargeable Lithium–CO<sub>2</sub> batteries. *Adv. Mater.* **30**, 1803124 (2018).
35. Ripes, R., Bhargav, A. & Manthiram, A. Nanostructured anatase titania as a cathode catalyst for Li–CO<sub>2</sub> batteries. *ACS Appl. Mater. Interfaces* **10**, 37119–37124 (2018).
36. Guo, Z., Li, J., Qi, H., Sun, X., Li, H., Tamirat, A. G., Liu, J., Wang, Y. & Wang, L. A highly reversible long life Li–CO<sub>2</sub> battery with a RuP<sub>2</sub>- based catalytic cathode. *Small* 1803246 (2018).
37. Liang, H., Zhang, Y., Chen, F., Jing, S., Yin, S. & Tsiakaras, P. A novel NiFe@NC-functionalized N-doped carbon microtubule network derived from biomass as a highly efficient 3D free-standing cathode for Li-CO<sub>2</sub> batteries. *Appl. Catal., B* **244**, 559–567 (2019).
38. Qiao, Y., Xu, S., Liu, Y., Dai, J., Xie, H., Yao, Y., Mu, X., Chen, C., Kline, D., Hitz, E., Liu, B., Song, J., He, P., Zachariah, M. & Hu, L. Transient, in situ synthesis of ultrafine ruthenium nanoparticles for a high-rate Li–CO<sub>2</sub> battery. *Energy Environ. Sci.* **12**, 1100–1107 (2019).
